# Supplementary material
Source: PubMed Central journal article supplement (PMC6468178)

# Supplemental Figure 1

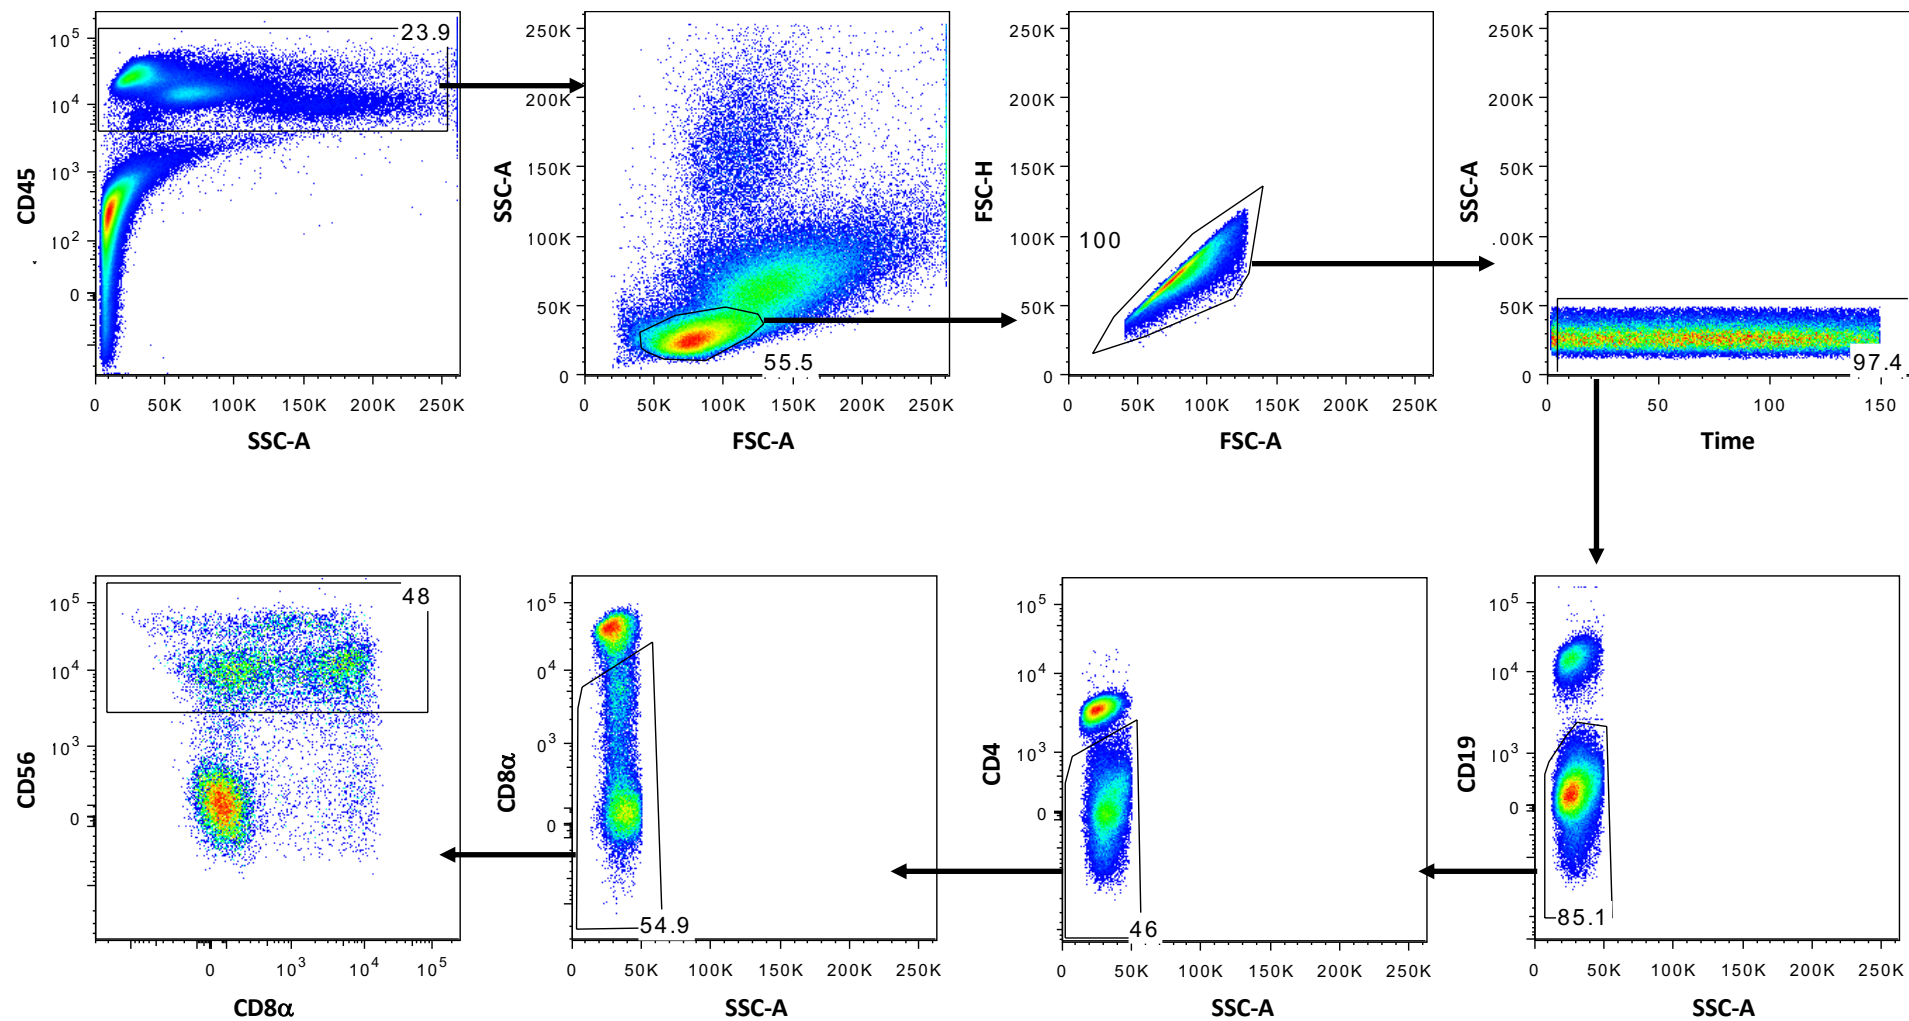

Supplement: CEI-196-226-s001.pdf [file CEI-196-226-s001.pdf]

# Supplemental Figure 2

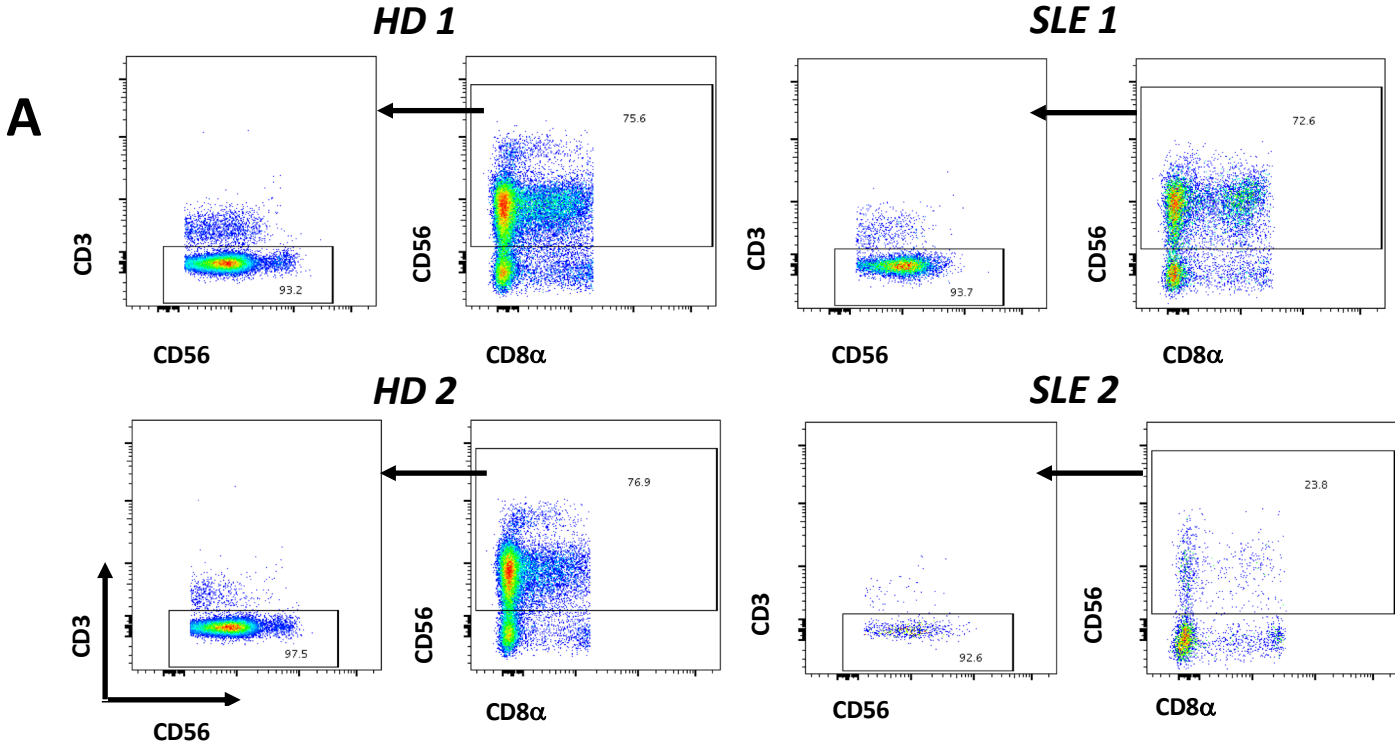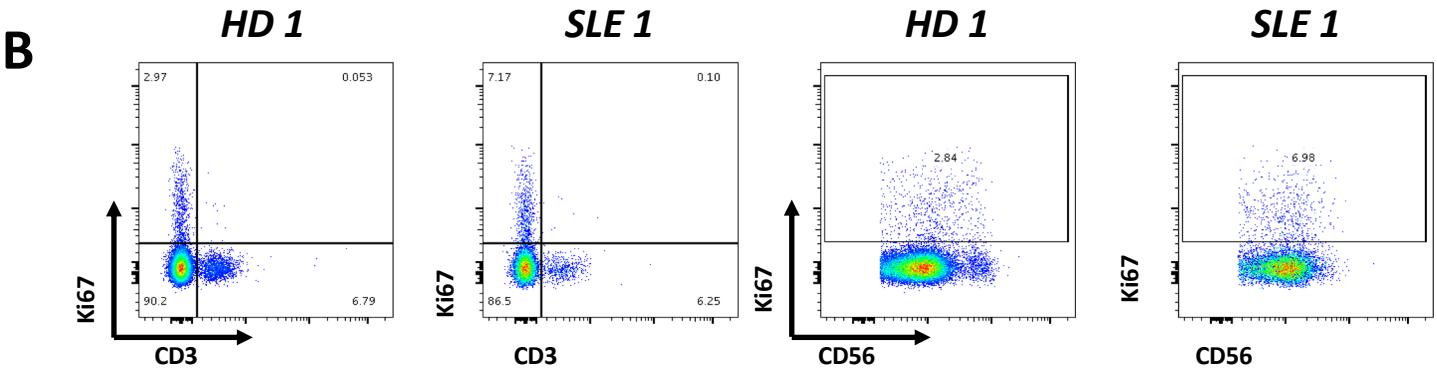

Supplement: CEI-196-226-s002.pdf [file CEI-196-226-s002.pdf]

# Supplemental Figure 3

**A**

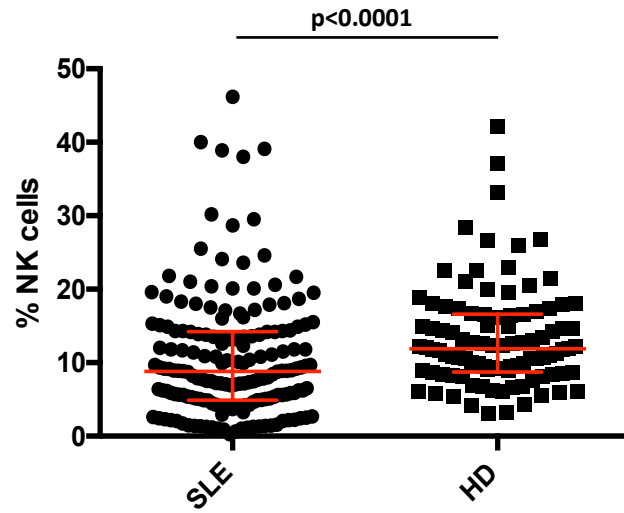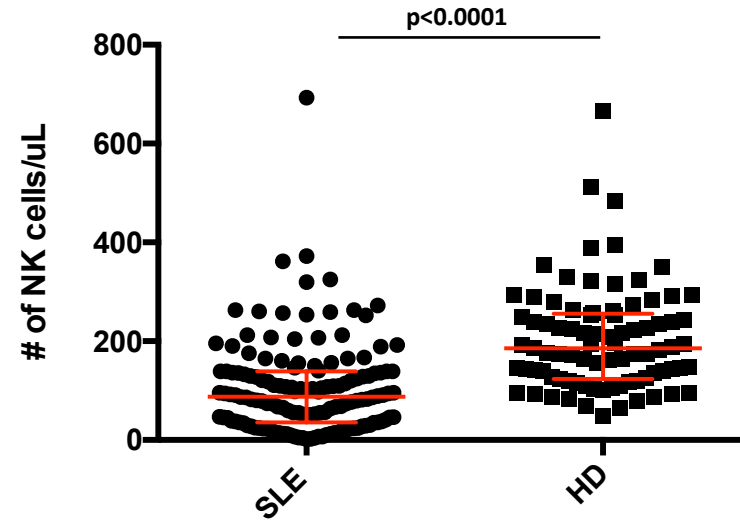

**B**

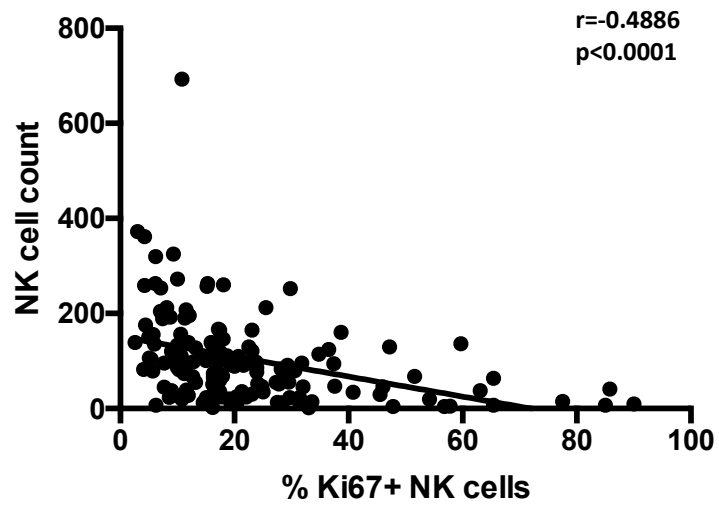

**C**

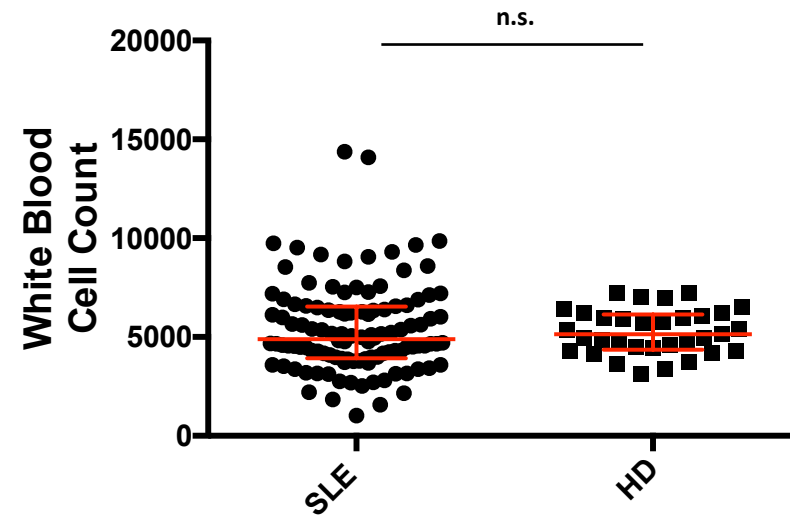

Supplement: CEI-196-226-s003.pdf [file CEI-196-226-s003.pdf]

# Supplemental Figure 4

**A**

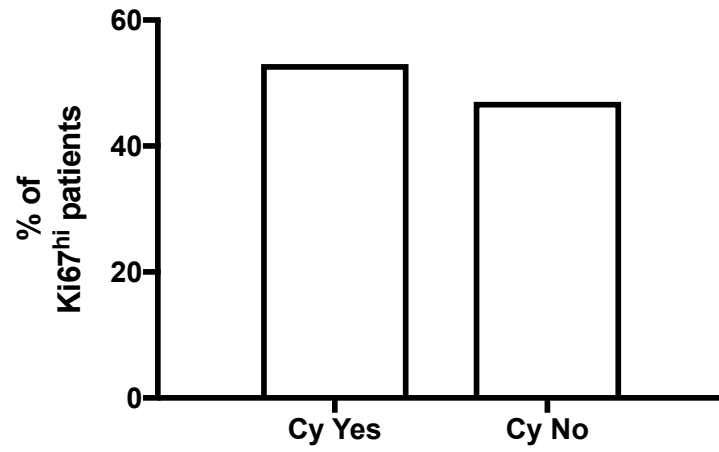

**B**

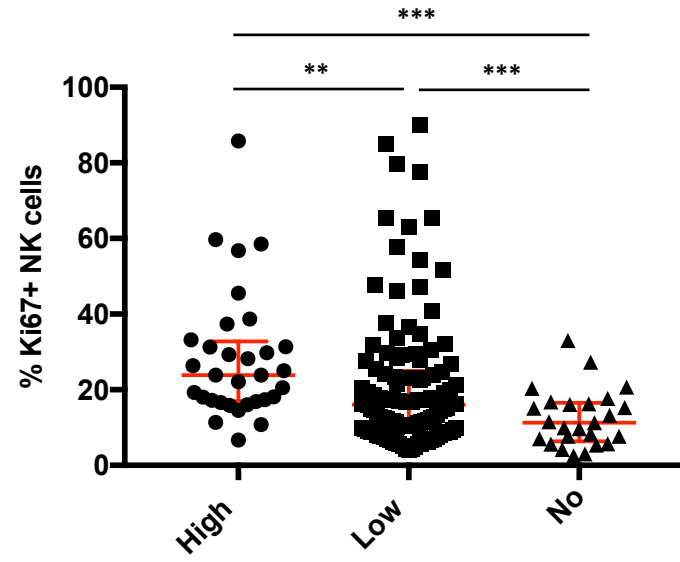

Supplement: CEI-196-226-s004.pdf [file CEI-196-226-s004.pdf]
